# Supplementary material
Source: PubMed Central journal article supplement (PMC1803751)
Supplement: plntphys_pp.106.092528_2.pdf [file plntphys_pp.106.092528_2.pdf]

**DryingStage** Active Tray 989

**Post Dry Information**

Oven Temperature: 92.0 °C

Placed in Oven: 08/23/2006 1pm 0  
mm/dd/yyyy Hour Min

Drying Period: 20.0 hours

Digestion Acid: Conc nitric acid  
0.7 mL

**Tube Information**

Click the button below to edit tube level information such as dry weights, standard reference materials, and digestion acid values.

**TUBE EDITOR**

**SaveStage**

**DryingStage** EXIT TUBE EDITOR  
Active Tray 989

**Tube Information**

The following list displays the weighed tubes only by default. To edit the non-weighed tubes of this experiment click the view non-weighed tubes link at the bottom.

**Weighed Tubes**

| Tube ID | Std Mtrl | Dig Acid                   | Dry Weight |
|---------|----------|----------------------------|------------|
| 2       | N/A      | Conc nitric acid<br>0.7 mL | 0.00212    |
| 11      | N/A      | Conc nitric acid<br>0.7 mL | 0.0021     |
| 20      | N/A      | Conc nitric acid<br>0.7 mL | 0.00169    |
| 29      | N/A      | Conc nitric acid<br>0.7 mL | 0.00284    |
| 38      | N/A      | Conc nitric acid<br>0.7 mL | 0.0022     |
| 47      | N/A      | Conc nitric acid<br>0.7 mL | 0.00302    |
| 56      | N/A      | Conc nitric acid<br>0.7 mL | 0.00274    |
